# Supplementary material for: Hetero aromatic donors as effective terminal groups for DPP based organic solar cells
Source: Royal Society of Chemistry journal article supplement (doi:10.1039/c5ra24610e), 2016-01-01
Supplement: c5ra24610e1.pdf [file c5ra24610e1.pdf]

## Supporting Information

### Hetero Aromatic Donors as Effective Terminal Groups for DPP Based Organic Solar Cells

<sup>a</sup> Network of Institutes for Solar Energy, CSIR- Indian Institute of Chemical Technology, I&PC Division, Uppal Road, Tarnaka, Hyderabad - 500 607, India.

<sup>b</sup>Academy of Scientific and Innovative Research, CSIR-IICT

<sup>c</sup> Department of Electronics and Communication Engineering, LNMIIT, Jaipur, India

<sup>d</sup>R & D Center for Science and Engineering, JEC Group of Colleges, Jaipur Engineering College Campus, Kukas, Jaipur 302028, India

E-mail: [chandra@iict.res.in](mailto:chandra@iict.res.in) phone Fax: +00914027193186 (M. Chandrasekharam)

[gdsharma273@gmail.com](mailto:gdsharma273@gmail.com) and [sharmagd\\_in@yahoo.com](mailto:sharmagd_in@yahoo.com) (G. D. Sharma)

## Content

|                                                                                                                                                                                                                                                                |    |
|----------------------------------------------------------------------------------------------------------------------------------------------------------------------------------------------------------------------------------------------------------------|----|
| <b>Figure S1.</b> Structures of optimized geometries of <b>CSDPP5-CSDPP8</b> at B3LYP/6-311 G(d,p) level.....                                                                                                                                                  | S3 |
| <b>Figure S2.</b> Molecular orbitals of (a) <b>CSDPP5</b> , (b) <b>CSDPP6</b> , (c) <b>CSDPP7</b> , and (d) <b>CSDPP8</b> in B3LYP functional, involved in transitions that contribute to the first excitation and to the next high absorbance excitation..... | S4 |
| <b>Figure S3.</b> Percentage contributions of the orbital density of the individual groups in HOMO-2, HOMO-1, HOMO, LUMO, LUMO+1 and LUMO+2 of the <b>CSDPP</b> dyes.....                                                                                      | S5 |
| <b>Table S1-Table S4.</b> Calculated excitation energies.....                                                                                                                                                                                                  | S6 |
| <b>Table S5.</b> Calculated HOMOs and LUMOs energy levels.....                                                                                                                                                                                                 | S7 |
| <b>Table S6.</b> Optimized geometry parameters of <b>CSDPP5-CSDPP8</b> calculated at B3LYP/6-311 G(d,p) level theory.....                                                                                                                                      | S8 |

**Figure S1.** Structures of optimized geometries of **CSDPP5-CSDPP8** at B3LYP/6-311 G(d,p) level theory.

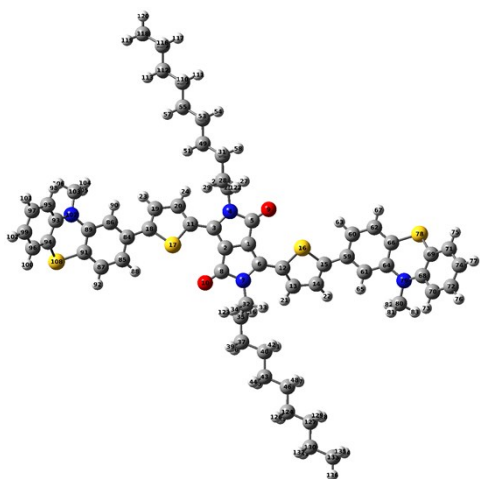

**CSDPP5**

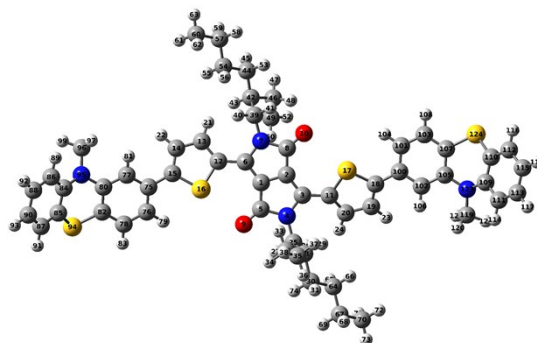

**CSDPP6**

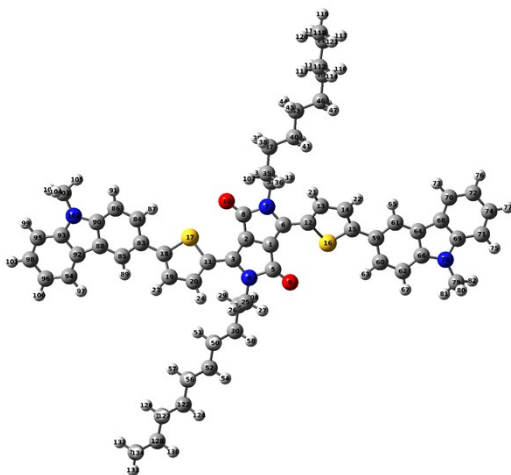

**CSDPP7**

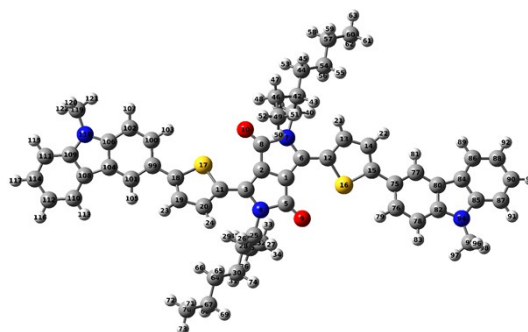

**CSDPP8**

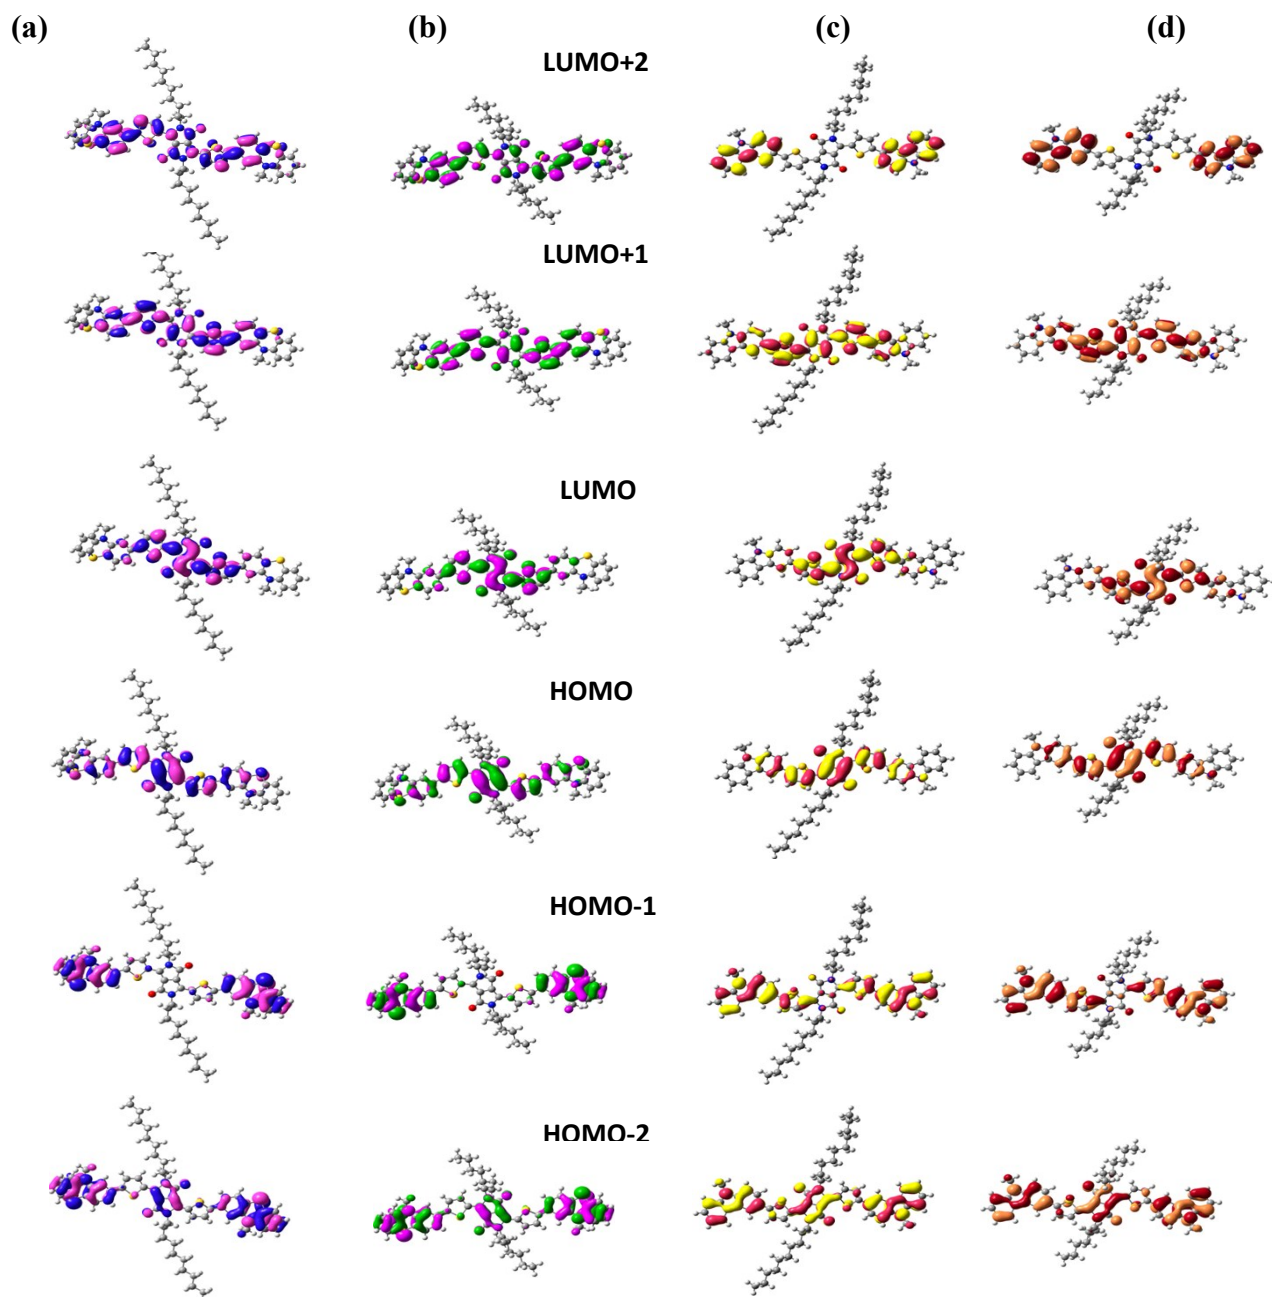

**Figure S2.** Molecular orbitals of (a) CSDPP5, (b) CSDPP6, (c) CSDPP7, and (d) CSDPP8 in B3LYP functional, involved in transitions that contribute to the first excitation and to the next high absorbance excitation.

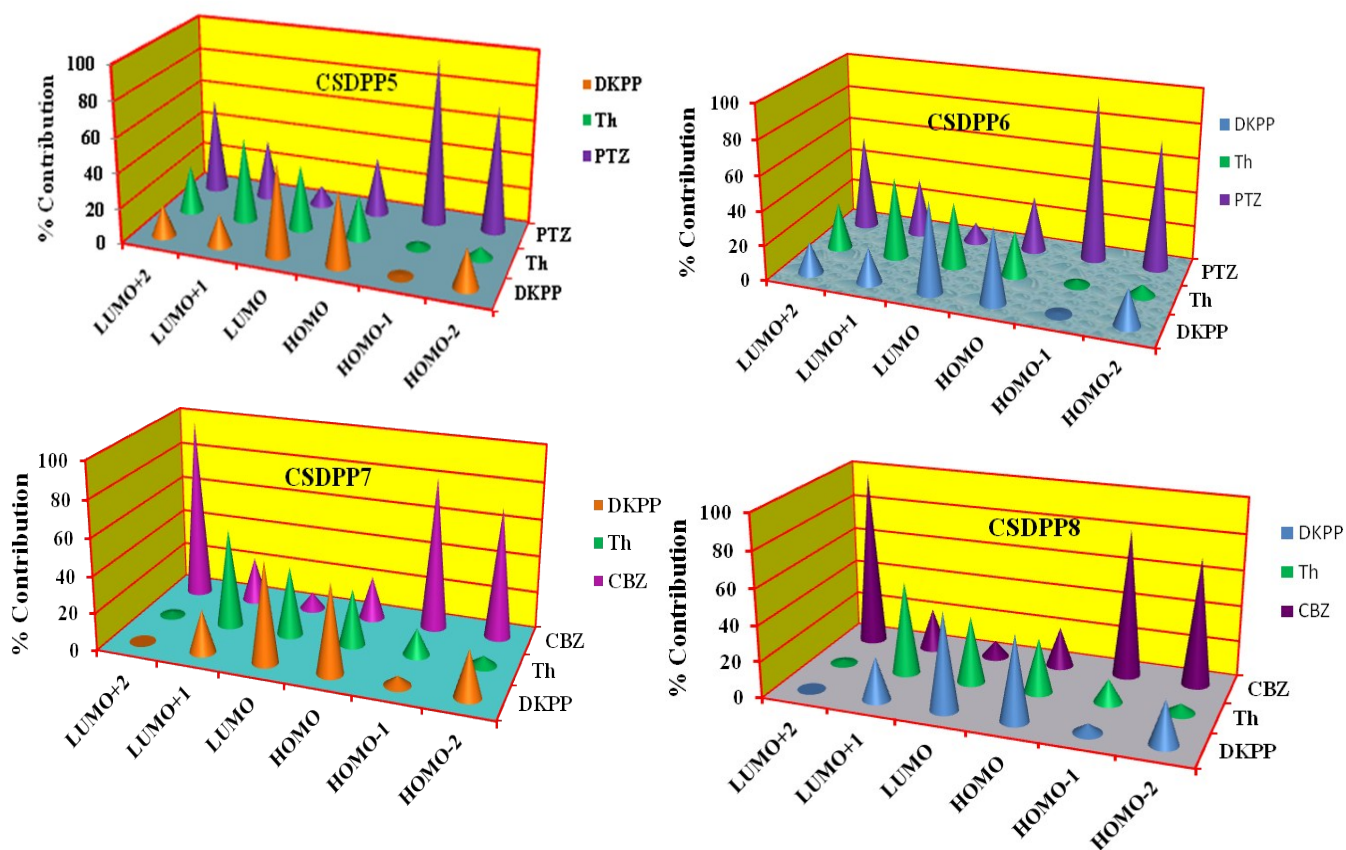

**Figure S3.** Percentage contributions of the orbital density of the individual groups in HOMO-2, HOMO-1, HOMO, LUMO, LUMO+1 and LUMO+2 of the CSDPP dyes.

**Table S1.** Calculated excitation energies for **CSDPP5** in THF solution.

| N_States | E (eV) | WL (nm) | f      | Composition     |
|----------|--------|---------|--------|-----------------|
| 1        | 2.01   | 615     | 1.2162 | H → L (99%)     |
| 2        | 2.26   | 548     | 0.0015 | H-1 → L (99%)   |
| 3        | 2.39   | 520     | 0.1307 | H-2 → L (98%)   |
| 4        | 2.99   | 414     | 0.0014 | H-3 → L (18%)   |
| 5        | 3.16   | 393     | 0.0417 | H-7 → L (43%)   |
| 6        | 3.19   | 390     | 0.3008 | H-4 → L (82%)   |
| 7        | 3.22   | 386     | 0.0062 | H-7 → L (35%)   |
| 8        | 3.22   | 374     | 0.1176 | H-1 → L+1 (87%) |
| 9        | 3.40   | 365     | 0.0006 | H-2 → L+1 (83%) |
| 10       | 3.50   | 355     | 0.0097 | H-12 → L (14%)  |

**Table S2.** Calculated excitation energies for **CSDPP6** in THF solution.

| N_States | E (eV) | WL (nm) | f      | Composition     |
|----------|--------|---------|--------|-----------------|
| 1        | 1.99   | 624     | 1.2145 | H → L (99%)     |
| 2        | 2.24   | 554     | 0.0011 | H-1 → L (99%)   |
| 3        | 2.36   | 525     | 0.1227 | H-2 → L (98%)   |
| 4        | 2.97   | 418     | 0.0009 | H-3 → L (17%)   |
| 5        | 3.13   | 396     | 0.0028 | H-7 → L (51%)   |
| 6        | 3.15   | 394     | 0.3491 | H-4 → L (88%)   |
| 7        | 3.19   | 388     | 0.0106 | H-7 → L (26%)   |
| 8        | 3.30   | 376     | 0.1184 | H-1 → L+1 (88%) |
| 9        | 3.38   | 367     | 0.0011 | H-2 → L+1 (84%) |
| 10       | 3.50   | 355     | 0.0452 | H-8 → L (21%)   |

**Table S3.** Calculated excitation energies for **CSDPP7** in THF solution.

| N States | E (eV) | WL (nm) | f      | Combination    |
|----------|--------|---------|--------|----------------|
| 1        | 2.05   | 606     | 1.5051 | H → L (99%)    |
| 2        | 2.62   | 473     | 0.0027 | H-1 → L (97%)  |
| 3        | 2.78   | 445     | 0.1448 | H-2 → L (97%)  |
| 4        | 3.08   | 402     | 0.0015 | H-3 → L (81%)  |
| 5        | 3.11   | 399     | 0.0603 | H-4 → L (95%)  |
| 6        | 3.15   | 394     | 0.0036 | H-7 → L (14%)  |
| 7        | 3.24   | 382     | 0.001  | H-7 → L (33%)  |
| 8        | 3.43   | 361     | 0.0215 | H → L+2 (78%)  |
| 9        | 3.44   | 361     | 0.0005 | H → L+2 (13%)  |
| 10       | 3.55   | 350     | 0.0073 | H-10 → L (17%) |

**Table S4.** Calculated excitation energies for **CSDPP8** in THF solution.

| N States | E (eV) | WL (nm)  | f      | Composition    |
|----------|--------|----------|--------|----------------|
| 1        | 2.02   | 614.3872 | 1.4894 | H → L (99%)    |
| 2        | 2.60   | 476.9874 | 0.0038 | H-1 → L (97%)  |
| 3        | 2.77   | 448.2081 | 0.1569 | H-2 → L (97%)  |
| 4        | 3.06   | 404.8832 | 0.001  | H-3 → L (73%)  |
| 5        | 3.09   | 401.5525 | 0.0611 | H-4 → L (96%)  |
| 6        | 3.11   | 398.1098 | 0.0042 | H-3 → L (21%)  |
| 7        | 3.21   | 385.9043 | 0.0019 | H-7 → L (13%)  |
| 8        | 3.42   | 362.917  | 0.0193 | H → L+2 (89%)  |
| 9        | 3.43   | 362.2913 | 0.001  | H → L+3 (89%)  |
| 10       | 3.55   | 349.2488 | 0.0182 | H-10 → L (21%) |

**Table S5.** Calculated HOMOs and LUMOs energies (eV) of the **CSDPP** molecules.

|         | <b>CSDPP5</b> | <b>CSDPP6</b> | <b>CSDPP7</b> | <b>CSDPP8</b> |
|---------|---------------|---------------|---------------|---------------|
| L+2     | -1.17         | -1.18         | -1.26         | -1.26         |
| L+1     | -1.74         | -1.77         | -1.51         | -1.54         |
| L       | -2.88         | -2.91         | -2.75         | -2.77         |
| H       | -5.18         | -5.16         | -5.06         | -5.04         |
| H-1     | -5.45         | -5.45         | -5.68         | -5.68         |
| H-2     | -5.56         | -5.56         | -5.85         | -5.85         |
| H-L Gap | 2.30          | 2.25          | 2.31          | 2.27          |

**Table S6.** Optimized geometry parameters of **CSDPP5-CSDPP8** calculated at B3LYP/6-311 G(d,p) level theory.

| <b>CSDPP5</b>                                                                    |         | <b>CSDPP6</b>                                                        |         | <b>CSDPP7</b>                                                      |         | <b>CSDPP8</b>                                                       |         |
|----------------------------------------------------------------------------------|---------|----------------------------------------------------------------------|---------|--------------------------------------------------------------------|---------|---------------------------------------------------------------------|---------|
| Bond lengths (°A)                                                                |         |                                                                      |         |                                                                    |         |                                                                     |         |
| C <sub>6</sub> -C <sub>12</sub>                                                  | 1.44    | C <sub>6</sub> -C <sub>12</sub>                                      | 1.44    | C <sub>6</sub> -C <sub>12</sub>                                    | 1.44    | C <sub>6</sub> -C <sub>12</sub>                                     | 1.44    |
| C <sub>15</sub> -C <sub>59</sub>                                                 | 1.46    | C <sub>15</sub> -C <sub>75</sub>                                     | 1.46    | C <sub>15</sub> -C <sub>59</sub>                                   | 1.46    | C <sub>15</sub> -C <sub>75</sub>                                    | 1.46    |
| C <sub>3</sub> -C <sub>11</sub>                                                  | 1.44    | C <sub>3</sub> -C <sub>11</sub>                                      | 1.44    | C <sub>3</sub> -C <sub>11</sub>                                    | 1.44    | C <sub>3</sub> -C <sub>11</sub>                                     | 1.44    |
| C <sub>18</sub> -C <sub>84</sub>                                                 | 1.46    | C <sub>18</sub> -C <sub>100</sub>                                    | 1.46    | C <sub>18</sub> -C <sub>83</sub>                                   | 1.46    | C <sub>18</sub> -C <sub>99</sub>                                    | 1.46    |
| Dihedral angles (°)                                                              |         |                                                                      |         |                                                                    |         |                                                                     |         |
| S <sub>17</sub> -C <sub>11</sub> -C <sub>3</sub> -C <sub>2</sub>                 | 18.97   | N <sub>7</sub> -C <sub>6</sub> -C <sub>12</sub> -C <sub>13</sub>     | 11.54   | C <sub>2</sub> -C <sub>3</sub> -C <sub>11</sub> -S <sub>17</sub>   | 19.10   | N <sub>4</sub> -C <sub>3</sub> -C <sub>11</sub> -C <sub>20</sub>    | 18.16   |
| S <sub>17</sub> -C <sub>11</sub> -C <sub>3</sub> -N <sub>4</sub>                 | -163.37 | N <sub>7</sub> -C <sub>6</sub> -C <sub>12</sub> -S <sub>16</sub>     | -167.87 | C <sub>2</sub> -C <sub>3</sub> -C <sub>11</sub> -C <sub>20</sub>   | -159.74 | C <sub>2</sub> -C <sub>3</sub> -C <sub>11</sub> -C <sub>20</sub>    | -159.35 |
| C <sub>20</sub> -C <sub>11</sub> -C <sub>3</sub> -C <sub>2</sub>                 | -159.91 | S <sub>16</sub> -C <sub>12</sub> -C <sub>6</sub> -C <sub>1</sub>     | 11.57   | S <sub>17</sub> -C <sub>11</sub> -C <sub>3</sub> -N <sub>4</sub>   | -162.96 | S <sub>17</sub> -C <sub>11</sub> -C <sub>3</sub> -C <sub>2</sub>    | 18.96   |
| C <sub>20</sub> -C <sub>11</sub> -C <sub>3</sub> -N <sub>4</sub>                 | 17.74   | C <sub>13</sub> -C <sub>12</sub> -C <sub>6</sub> -C <sub>1</sub>     | -169.01 | S <sub>17</sub> -C <sub>11</sub> -C <sub>3</sub> -C <sub>2</sub>   | 19.11   | S <sub>17</sub> -C <sub>11</sub> -C <sub>3</sub> -N <sub>4</sub>    | -163.51 |
| S <sub>17</sub> -C <sub>18</sub> -C <sub>84</sub> -C <sub>85</sub>               | -27.27  | S <sub>16</sub> -C <sub>15</sub> -C <sub>75</sub> -C <sub>76</sub>   | -26.77  | S <sub>17</sub> -C <sub>18</sub> -C <sub>83</sub> -C <sub>84</sub> | -28.28  | S <sub>17</sub> -C <sub>18</sub> -C <sub>99</sub> -C <sub>100</sub> | -28.09  |
| S <sub>17</sub> -C <sub>18</sub> -C <sub>84</sub> -C <sub>86</sub>               | 152.15  | S <sub>16</sub> -C <sub>15</sub> -C <sub>75</sub> -C <sub>77</sub>   | 153.67  | S <sub>17</sub> -C <sub>18</sub> -C <sub>83</sub> -C <sub>35</sub> | 152.08  | S <sub>17</sub> -C <sub>18</sub> -C <sub>99</sub> -C <sub>101</sub> | 152.28  |
| C <sub>85</sub> -C <sub>84</sub> -C <sub>18</sub> -C <sub>19</sub>               | 152.06  | C <sub>14</sub> -C <sub>15</sub> -C <sub>75</sub> -C <sub>77</sub>   | -28.09  | C <sub>19</sub> -C <sub>18</sub> -C <sub>83</sub> -C <sub>85</sub> | -28.16  | C <sub>19</sub> -C <sub>18</sub> -C <sub>99</sub> -C <sub>101</sub> | -27.91  |
| C <sub>1</sub> -C <sub>6</sub> -C <sub>12</sub> -C <sub>13</sub>                 | -157.19 | C <sub>14</sub> -C <sub>15</sub> -C <sub>75</sub> -C <sub>76</sub>   | 152.47  | C <sub>19</sub> -C <sub>18</sub> -C <sub>83</sub> -C <sub>84</sub> | 151.47  | C <sub>19</sub> -C <sub>18</sub> -C <sub>99</sub> -C <sub>100</sub> | 151.71  |
| C <sub>6</sub> -C <sub>12</sub> -C <sub>13</sub> -N <sub>7</sub>                 | -9.91   | C <sub>2</sub> -C <sub>3</sub> -C <sub>11</sub> -S <sub>17</sub>     | 19.39   | N <sub>7</sub> -C <sub>6</sub> -C <sub>12</sub> -C <sub>13</sub>   | 20.72   | S <sub>16</sub> -C <sub>15</sub> -C <sub>75</sub> -C <sub>78</sub>  | -28.07  |
| N <sub>7</sub> -S <sub>16</sub> -C <sub>6</sub> -C <sub>12</sub> -C <sub>1</sub> | -39.97  | C <sub>2</sub> -C <sub>3</sub> -C <sub>11</sub> -C <sub>20</sub>     | -158.78 | N <sub>7</sub> -C <sub>6</sub> -C <sub>12</sub> -S <sub>16</sub>   | -160.57 | S <sub>16</sub> -C <sub>15</sub> -C <sub>75</sub> -C <sub>77</sub>  | 152.11  |
| S <sub>16</sub> -C <sub>6</sub> -C <sub>12</sub> -C <sub>1</sub>                 | -21.78  | C <sub>20</sub> -C <sub>11</sub> -C <sub>3</sub> -N <sub>4</sub>     | 18.28   | S <sub>16</sub> -C <sub>12</sub> -C <sub>6</sub> -C <sub>1</sub>   | 20.90   | C <sub>77</sub> -C <sub>75</sub> -C <sub>15</sub> -C <sub>14</sub>  | -28.00  |
| C <sub>6</sub> -C <sub>12</sub> -C <sub>1</sub> -C <sub>13</sub>                 | -38.98  | S <sub>17</sub> -C <sub>11</sub> -C <sub>3</sub> -N <sub>4</sub>     | -163.54 | C <sub>1</sub> -C <sub>6</sub> -C <sub>12</sub> -C <sub>13</sub>   | 157.80  | C <sub>14</sub> -C <sub>15</sub> -C <sub>75</sub> -C <sub>76</sub>  | 151.82  |
| S <sub>16</sub> -C <sub>15</sub> -C <sub>59</sub> -C <sub>60</sub>               | -28.63  | S <sub>17</sub> -C <sub>18</sub> -C <sub>100</sub> -C <sub>101</sub> | -27.14  | S <sub>16</sub> -C <sub>15</sub> -C <sub>59</sub> -C <sub>60</sub> | -29.48  | C <sub>1</sub> -C <sub>6</sub> -C <sub>12</sub> -S <sub>16</sub>    | 11.29   |
| C <sub>61</sub> -S <sub>16</sub> -C <sub>15</sub> -C <sub>59</sub>               | -24.65  | S <sub>17</sub> -C <sub>18</sub> -C <sub>100</sub> -C <sub>102</sub> | 152.49  | S <sub>16</sub> -C <sub>15</sub> -C <sub>59</sub> -C <sub>61</sub> | 151.09  | C <sub>1</sub> -C <sub>6</sub> -C <sub>12</sub> -C <sub>13</sub>    | -169.49 |
| C <sub>14</sub> -C <sub>15</sub> -C <sub>59</sub> -C <sub>61</sub>               | -29.87  | C <sub>19</sub> -C <sub>18</sub> -C <sub>100</sub> -C <sub>102</sub> | -28.33  | C <sub>14</sub> -C <sub>15</sub> -C <sub>59</sub> -C <sub>61</sub> | -29.33  | N <sub>7</sub> -C <sub>6</sub> -C <sub>12</sub> -C <sub>13</sub>    | 11.46   |
| C <sub>60</sub> -C <sub>59</sub> -C <sub>15</sub> -C <sub>14</sub>               | 150.70  | C <sub>19</sub> -C <sub>18</sub> -C <sub>100</sub> -C <sub>101</sub> | 152.03  | C <sub>14</sub> -C <sub>15</sub> -C <sub>59</sub> -C <sub>60</sub> | 150.09  | N <sub>7</sub> -C <sub>6</sub> -C <sub>12</sub> -S <sub>16</sub>    | -167.75 |
